# Supplementary material
Source: PubMed Central journal article supplement (PMC10070781)
Supplement: mmc1.pdf [file mmc1.pdf]

**Supplementary material (online only)** to the article Toshkov, D. (2023) ‘What Accounts for the Variation in COVID-19 Vaccine Hesitancy in Eastern, Southern and Western Europe?’, *Vaccine*.

*Descriptive statistics*

*Table A1.* Table of descriptive statistics

| <b>Variable</b>           | <b>Mean/N</b> | <b>St. Dev./Share</b> | <b>Min</b> | <b>Max</b> |
|---------------------------|---------------|-----------------------|------------|------------|
| Region                    | 26106         |                       |            |            |
| ... Eastern Europe        | 11250         | 43%                   |            |            |
| ... Southern Europe       | 5151          | 20%                   |            |            |
| ... Western Europe        | 9705          | 37%                   |            |            |
| Age (ag in years)         | 45.48         | 16.79                 | 15         | 93         |
| Education (age complete)  | 21.39         | 4.46                  | 14         | 81         |
| Gender (male)             | 0.48          | 0.50                  | 0          | 1          |
| Place of residence (city) | 0.35          | 0.48                  | 0          | 1          |
| Employment                | 24843         |                       |            |            |
| ... employee              | 1249          | 50%                   |            |            |
| ... manual                | 1513          | 6%                    |            |            |
| ... no activity           | 7870          | 32%                   |            |            |
| ... self-employed         | 2969          | 12%                   |            |            |
| Trust.EU.info             | 0.23          | 0.42                  | 0          | 1          |
| Trust.gov.info            | 0.18          | 0.39                  | 0          | 1          |
| Trust.health.info         | 0.44          | 0.50                  | 0          | 1          |
| Trust.local.info          | 0.13          | 0.33                  | 0          | 1          |
| Trust.doctors.info        | 0.61          | 0.49                  | 0          | 1          |
| Trust.media.info          | 0.11          | 0.31                  | 0          | 1          |
| Trust.web.info            | 0.08          | 0.27                  | 0          | 1          |
| Trust.networks.info       | 0.057         | 0.23                  | 0          | 1          |
| Trust.people.info         | 0.16          | 0.36                  | 0          | 1          |
| Vaccines are safe         | 0.77          | 0.42                  | 0          | 1          |
| Vaccines are effective    | 0.84          | 0.37                  | 0          | 1          |
| Knows ill from COVID-19   | 0.75          | 0.44                  | 0          | 1          |
| Was ill from COVID-19     | 0.11          | 0.31                  | 0          | 1          |
| Fears infection           | 0.43          | 0.50                  | 0          | 1          |
| Vaccine hesitant          | 0.26          | 0.44                  | 0          | 1          |
| Vaccine refusal           | 0.11          | 0.32                  | 0          | 1          |

*Reasons for vaccination and vaccine hesitancy*

The public opinion survey also includes questions about the reasons respondents opted to vaccinate or expressed hesitancy or refusal to do so. The usefulness of this data, however, is limited by the fact that different sets of reasons were provided to vaccine-approving and to vaccine-hesitant people. Therefore, we cannot know the overall popularity of different reasons in the total populations or to compare the appeal of different reasons between people with different opinions on vaccination. Nevertheless, we can compare the popularity of different reasons among the subsets of vaccine-approving and vaccine-hesitant respondents across the three European regions.

Figures A1 and A2 plot the means of agreement with different reasons per region. When it comes to vaccine hesitancy, there are not too many big differences in the popularity of different reasons.

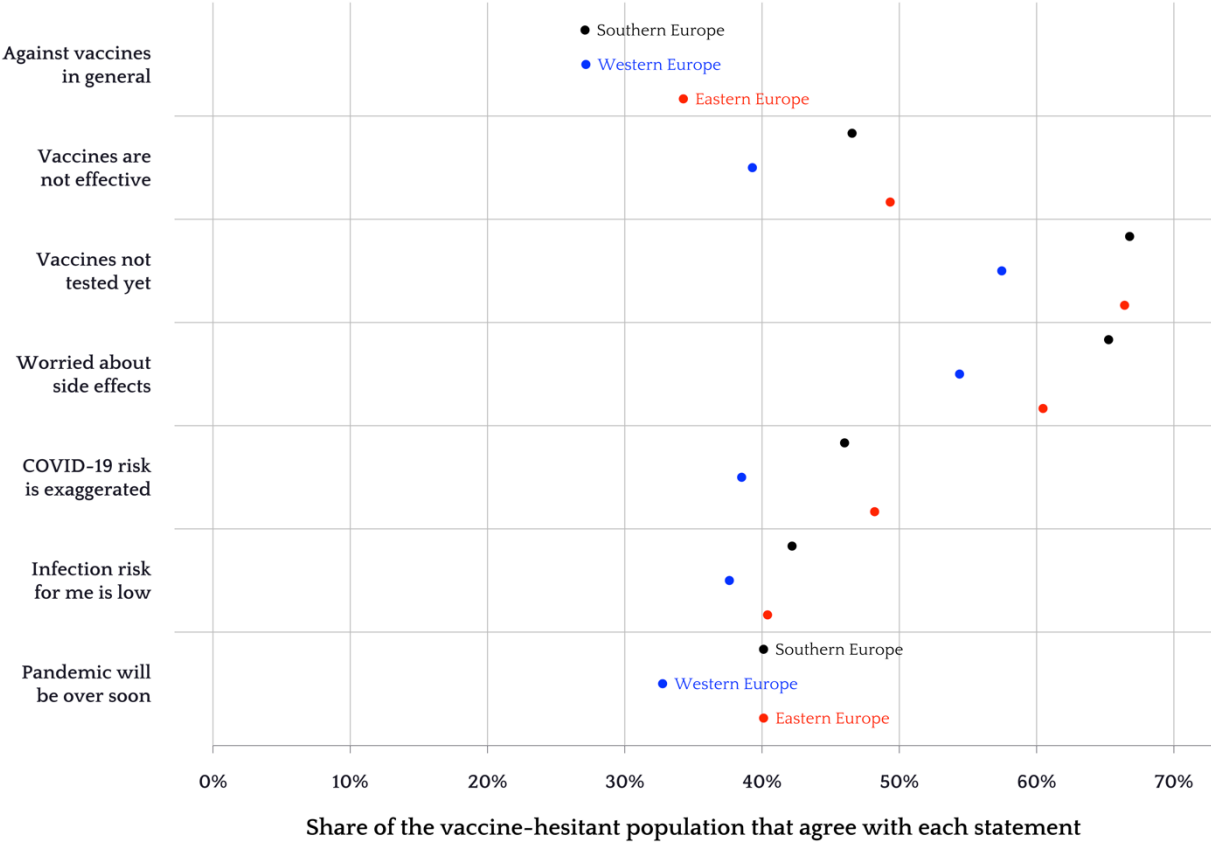

Figure A1. Share of the vaccine-hesitant population in Eastern, Wester and Southern Europe that agree with each reason for non-vaccinating. Data: Flash Eurobarometer 494, May 2021.

However, being against vaccines in general is much more common argument among the vaccine hesitant in Eastern Europe than in the West and the South. The most popular argument in Southern Europe is worry about side effects and that the vaccines have not been properly tested yet. Overall, Western European vaccine-hesitant respondents endorse the least all the possible reasons given. Examining the reasons for vaccination, Southern European vaccine-approving people endorse to the greatest extent all the different possible reasons. For Western Europeans, the appeal of vaccines enabling travel and work is the weakest. Even though the arguments that vaccines will end the pandemic and will protect others are most popular in Eastern Europe compared to other arguments, their level of support is still significantly lower than in Western and Southern Europe. To remind, these differences are of limited use in explaining different *levels* of vaccine hesitancy in Europe, since only vaccine-accepting people were presented with reasons for vaccination and only vaccine-hesitant people were presented with reasons against (and because respondents could choose to endorse as many reasons as they want). But the relative popularity of different arguments *across* regions is still suggestive of the motivation of people to vaccinate or not.

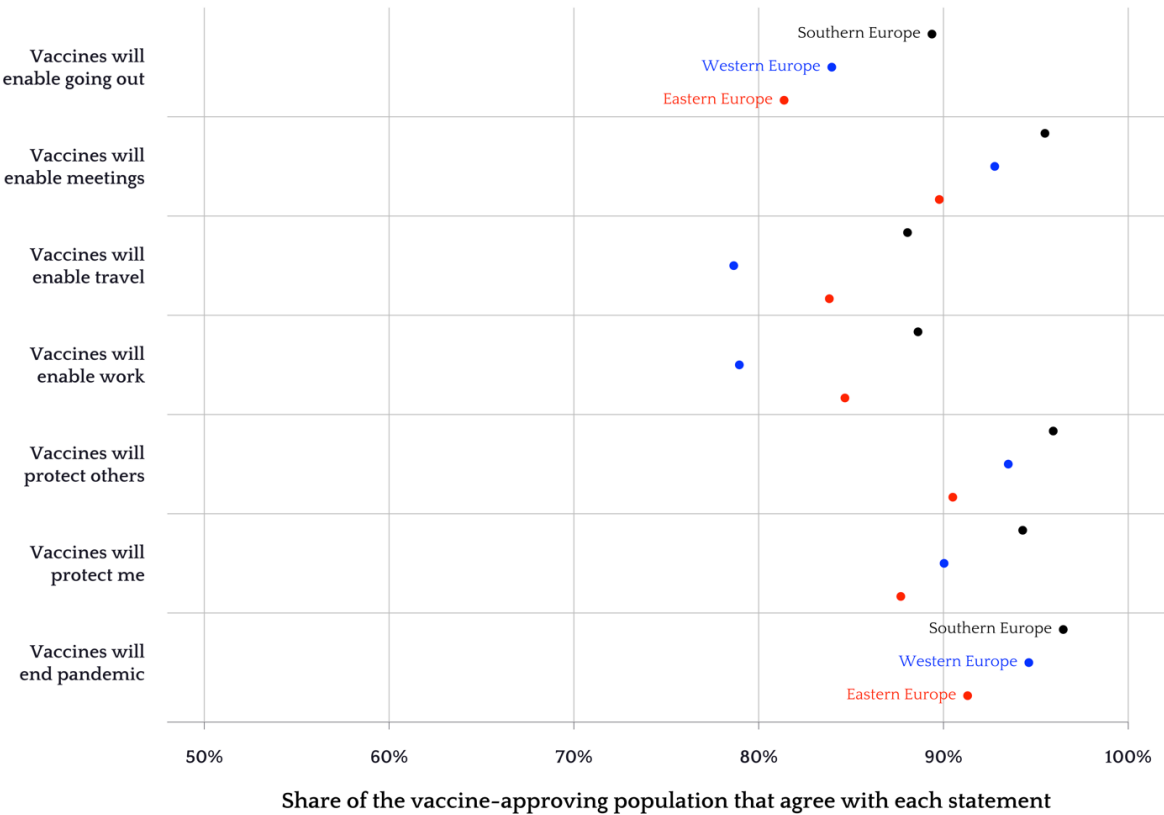

Figure A2. Share of the vaccine-approving population in Eastern, Western and Southern Europe that agree with each reason for vaccinating. Data: Flash Eurobarometer 494, May 2021.

Multivariate models of vaccine refusal and vaccine hesitancy 2

Table A2. Logistic regression models of vaccine refusal

|                        | <b>Model A1</b>                | <b>Model A2</b>                | <b>Model A3</b>                |
|------------------------|--------------------------------|--------------------------------|--------------------------------|
| <b>Characteristic</b>  | <b>OR (95% CI)<sup>†</sup></b> | <b>OR (95% CI)<sup>†</sup></b> | <b>OR (95% CI)<sup>†</sup></b> |
| Region                 |                                |                                |                                |
| <i>Eastern Europe</i>  | —                              | —                              | —                              |
| <i>Southern Europe</i> | 0.45 [0.40, 0.51]***           | 0.44 [0.38, 0.52]***           | 0.66 [0.56, 0.77]***           |
| <i>Western Europe</i>  | 0.49 [0.44, 0.54]***           | 0.50 [0.44, 0.56]***           | 0.57 [0.51, 0.65]***           |
| Trust.EU.info          | 0.30 [0.25, 0.34]***           | 0.24 [0.20, 0.29]***           | 0.33 [0.27, 0.40]***           |
| Trust.gov.info         | 0.45 [0.37, 0.54]***           | 0.45 [0.36, 0.56]***           | 0.62 [0.49, 0.77]***           |
| Trust.health.info      | 0.23 [0.21, 0.26]***           | 0.23 [0.20, 0.27]***           | 0.33 [0.28, 0.38]***           |
| Trust.local.info       | 0.60 [0.48, 0.73]***           | 0.55 [0.42, 0.71]***           | 0.64 [0.48, 0.83]**            |
| Trust.doctors.info     | 0.32 [0.29, 0.35]***           | 0.32 [0.29, 0.35]***           | 0.48 [0.43, 0.53]***           |
| Trust.media.info       | 0.61 [0.51, 0.73]***           | 0.58 [0.47, 0.72]***           | 0.74 [0.59, 0.93]**            |
| Trust.web.info         | 1.31 [1.14, 1.51]***           | 1.37 [1.15, 1.62]***           | 1.31 [1.09, 1.57]**            |
| Trust.networks.info    | 1.61 [1.37, 1.88]***           | 1.72 [1.42, 2.08]***           | 1.70 [1.38, 2.08]***           |
| Trust.people.info      | 0.84 [0.75, 0.94]**            | 0.76 [0.66, 0.87]***           | 0.74 [0.64, 0.86]***           |
| Age                    |                                | 0.98 [0.98, 0.98]***           | 0.98 [0.98, 0.99]***           |
| Education              |                                | 0.99 [0.98, 1.00]              | 1.00 [0.99, 1.01]              |
| Sex [male]             |                                | 0.92 [0.83, 1.01]              | 0.91 [0.82, 1.01]              |
| Residence [city]       |                                | 0.89 [0.80, 0.99]*             | 0.91 [0.82, 1.02]              |
| Occupation             |                                |                                |                                |
| <i>Employee</i>        |                                | —                              | —                              |
| <i>Manual worker</i>   |                                | 1.24 [1.02, 1.50]*             | 1.09 [0.89, 1.34]              |
| <i>No activity</i>     |                                | 1.29 [1.14, 1.47]***           | 1.24 [1.08, 1.42]**            |
| <i>self-employed</i>   |                                | 1.34 [1.15, 1.55]***           | 1.27 [1.09, 1.49]**            |
| Vaccines are safe      |                                |                                | 0.41 [0.36, 0.47]***           |

| <b>Characteristic</b>                      | <b>Model A1</b>                | <b>Model A2</b>                | <b>Model A3</b>                |
|--------------------------------------------|--------------------------------|--------------------------------|--------------------------------|
|                                            | <b>OR (95% CI)<sup>†</sup></b> | <b>OR (95% CI)<sup>†</sup></b> | <b>OR (95% CI)<sup>†</sup></b> |
| Vaccines are effective                     |                                |                                | 0.48 [0.41, 0.55]***           |
| Knows ill from COVID-19                    |                                |                                | 0.93 [0.82, 1.05]              |
| Was ill from COVID-19                      |                                |                                | 1.02 [0.86, 1.20]              |
| Fears infection                            |                                |                                | 0.26 [0.22, 0.30]***           |
| <i>Number of observations</i>              | <i>26,106</i>                  | <i>19,944</i>                  | <i>19,944</i>                  |
| <i>McFadden's Pseudo R-squared</i>         | <i>0.18</i>                    | <i>0.20</i>                    | <i>0.30</i>                    |
| <sup>†</sup> *p<0.05; **p<0.01; ***p<0.001 |                                |                                |                                |

Table A3. Logistic regression models of vaccine hesitancy 2 (excluding Don't know and no responses)

|                        | <b>Model A4</b>                | <b>Model A5</b>                | <b>Model A6</b>                |
|------------------------|--------------------------------|--------------------------------|--------------------------------|
| <b>Characteristic</b>  | <b>OR (95% CI)<sup>f</sup></b> | <b>OR (95% CI)<sup>f</sup></b> | <b>OR (95% CI)<sup>f</sup></b> |
| Region                 |                                |                                |                                |
| <i>Eastern Europe</i>  | —                              | —                              | —                              |
| <i>Southern Europe</i> | 0.38 [0.33, 0.43]***           | 0.37 [0.31, 0.43]***           | 0.54 [0.45, 0.64]***           |
| <i>Western Europe</i>  | 0.41 [0.37, 0.45]***           | 0.41 [0.36, 0.46]***           | 0.44 [0.38, 0.50]***           |
| Trust.EU.info          | 0.25 [0.21, 0.29]***           | 0.20 [0.16, 0.24]***           | 0.29 [0.23, 0.35]***           |
| Trust.gov.info         | 0.39 [0.33, 0.47]***           | 0.39 [0.31, 0.48]***           | 0.54 [0.42, 0.68]***           |
| Trust.health.info      | 0.19 [0.17, 0.22]***           | 0.19 [0.17, 0.22]***           | 0.29 [0.25, 0.34]***           |
| Trust.local.info       | 0.54 [0.43, 0.66]***           | 0.47 [0.36, 0.61]***           | 0.55 [0.40, 0.73]***           |
| Trust.doctors.info     | 0.26 [0.24, 0.29]***           | 0.27 [0.24, 0.30]***           | 0.44 [0.39, 0.49]***           |
| Trust.media.info       | 0.57 [0.47, 0.68]***           | 0.54 [0.43, 0.67]***           | 0.68 [0.53, 0.87]**            |
| Trust.web.info         | 1.31 [1.12, 1.53]***           | 1.35 [1.13, 1.62]**            | 1.27 [1.03, 1.56]*             |
| Trust.networks.info    | 1.65 [1.39, 1.95]***           | 1.78 [1.44, 2.19]***           | 1.79 [1.41, 2.27]***           |
| Trust.people.info      | 0.88 [0.78, 0.99]*             | 0.79 [0.68, 0.91]***           | 0.75 [0.64, 0.89]***           |
| Age                    |                                | 0.97 [0.97, 0.98]***           | 0.98 [0.97, 0.98]***           |
| Education              |                                | 0.99 [0.98, 1.00]              | 1.00 [0.98, 1.01]              |
| Sex [male]             |                                | 0.86 [0.77, 0.95]**            | 0.82 [0.73, 0.93]**            |
| Residence [city]       |                                | 0.88 [0.79, 0.98]*             | 0.93 [0.82, 1.05]              |
| Occupation             |                                |                                |                                |
| <i>Employee</i>        |                                | —                              | —                              |
| <i>Manual worker</i>   |                                | 1.49 [1.21, 1.83]***           | 1.36 [1.07, 1.72]*             |
| <i>No activity</i>     |                                | 1.41 [1.24, 1.61]***           | 1.37 [1.18, 1.60]***           |
| <i>self-employed</i>   |                                | 1.42 [1.22, 1.66]***           | 1.35 [1.13, 1.61]***           |
| Vaccines are safe      |                                |                                | 0.32 [0.27, 0.37]***           |

| <b>Characteristic</b>                      | <b>Model A4</b>                | <b>Model A5</b>                | <b>Model A6</b>                |
|--------------------------------------------|--------------------------------|--------------------------------|--------------------------------|
|                                            | <b>OR (95% CI)<sup>†</sup></b> | <b>OR (95% CI)<sup>†</sup></b> | <b>OR (95% CI)<sup>†</sup></b> |
| Vaccines are effective                     |                                |                                | 0.33 [0.28, 0.38]***           |
| Knows ill from COVID-19                    |                                |                                | 0.85 [0.74, 0.98]*             |
| Was ill from COVID-19                      |                                |                                | 1.12 [0.93, 1.34]              |
| Fears infection                            |                                |                                | 0.21 [0.18, 0.25]***           |
| <i>Number of observations</i>              | <i>22,223</i>                  | <i>17,212</i>                  | <i>17,212</i>                  |
| <i>McFadden's Pseudo R-squared</i>         | <i>0.24</i>                    | <i>0.27</i>                    | <i>0.41</i>                    |
| <sup>†</sup> *p<0.05; **p<0.01; ***p<0.001 |                                |                                |                                |

*Multivariate models of vaccine hesitancy and refusal with region interactions*

Table A4. Logistic regression models with interaction.

| Characteristic         | Model A7                 | Model A8                 | Model A9                 |
|------------------------|--------------------------|--------------------------|--------------------------|
|                        | Vaccine hesitancy        | Vaccine refusal          | Hesitancy 2              |
|                        | OR (95% CI) <sup>†</sup> | OR (95% CI) <sup>†</sup> | OR (95% CI) <sup>†</sup> |
| Region                 |                          |                          |                          |
| <i>Eastern Europe</i>  | —                        | —                        | —                        |
| <i>Southern Europe</i> | 0.29 [0.13, 0.65]**      | 0.50 [0.17, 1.50]        | 0.21 [0.07, 0.69]**      |
| <i>Western Europe</i>  | 0.40 [0.22, 0.73]**      | 0.45 [0.22, 0.94]*       | 0.18 [0.08, 0.42]***     |
| Trust.EU.info          | 0.48 [0.41, 0.56]***     | 0.36 [0.28, 0.45]***     | 0.32 [0.24, 0.41]***     |
| Trust.gov.info         | 0.67 [0.54, 0.83]***     | 0.71 [0.51, 0.97]*       | 0.59 [0.41, 0.82]**      |
| Trust.health.info      | 0.48 [0.42, 0.55]***     | 0.36 [0.30, 0.44]***     | 0.31 [0.25, 0.38]***     |
| Trust.local.info       | 0.65 [0.50, 0.84]**      | 0.51 [0.33, 0.76]**      | 0.39 [0.24, 0.61]***     |
| Trust.doctors.info     | 0.62 [0.55, 0.69]***     | 0.48 [0.42, 0.55]***     | 0.43 [0.36, 0.50]***     |
| Trust.media.info       | 0.84 [0.68, 1.03]        | 0.85 [0.64, 1.12]        | 0.77 [0.56, 1.05]        |
| Trust.web.info         | 1.08 [0.88, 1.32]        | 1.33 [1.04, 1.68]*       | 1.23 [0.92, 1.62]        |
| Trust.networks.info    | 1.72 [1.36, 2.17]***     | 1.82 [1.41, 2.36]***     | 1.95 [1.42, 2.66]***     |
| Trust.people.info      | 1.02 [0.88, 1.17]        | 0.72 [0.61, 0.85]***     | 0.71 [0.57, 0.86]***     |
| Age                    | 0.98 [0.97, 0.98]***     | 0.98 [0.98, 0.99]***     | 0.98 [0.97, 0.98]***     |
| Education              | 0.99 [0.97, 1.00]        | 0.99 [0.97, 1.00]        | 0.98 [0.96, 1.00]        |
| Sex [male]             | 0.76 [0.68, 0.85]***     | 0.88 [0.77, 1.01]        | 0.78 [0.67, 0.92]**      |
| Residence [city]       | 0.97 [0.87, 1.09]        | 0.90 [0.78, 1.03]        | 0.94 [0.80, 1.10]        |
| Occupation             |                          |                          |                          |
| <i>Employee</i>        | —                        | —                        | —                        |
| <i>Manual worker</i>   | 1.85 [1.48, 2.31]***     | 1.19 [0.92, 1.52]        | 1.60 [1.17, 2.18]**      |
| <i>No activity</i>     | 1.30 [1.13, 1.51]***     | 1.23 [1.04, 1.47]*       | 1.37 [1.12, 1.68]**      |
| <i>Self-employed</i>   | 1.25 [1.05, 1.48]**      | 1.10 [0.89, 1.35]        | 1.21 [0.95, 1.54]        |



| Characteristic                               | Model A7                 | Model A8                 | Model A9                 |
|----------------------------------------------|--------------------------|--------------------------|--------------------------|
|                                              | Vaccine hesitancy        | Vaccine refusal          | Hesitancy 2              |
|                                              | OR (95% CI) <sup>†</sup> | OR (95% CI) <sup>†</sup> | OR (95% CI) <sup>†</sup> |
| Vaccines are safe                            | 0.35 [0.31, 0.41]***     | 0.43 [0.36, 0.51]***     | 0.32 [0.26, 0.39]***     |
| Vaccines are effective                       | 0.34 [0.28, 0.40]***     | 0.50 [0.41, 0.59]***     | 0.30 [0.24, 0.37]***     |
| Knows ill from COVID-19                      | 0.74 [0.64, 0.85]***     | 0.97 [0.82, 1.14]        | 0.83 [0.68, 1.02]        |
| Was ill from COVID-19                        | 1.32 [1.13, 1.54]***     | 0.96 [0.79, 1.17]        | 1.13 [0.89, 1.42]        |
| Fears infection                              | 0.37 [0.32, 0.41]***     | 0.24 [0.20, 0.29]***     | 0.19 [0.15, 0.23]***     |
| <i>Southern Europe * trust.EU.info</i>       | 1.11 [0.81, 1.52]        | 0.76 [0.39, 1.38]        | 0.72 [0.36, 1.33]        |
| <i>Western Europe * trust.EU.info</i>        | 0.73 [0.52, 1.00]        | 0.74 [0.41, 1.28]        | 0.73 [0.40, 1.28]        |
| <i>Southern Europe * trust.gov.info</i>      | 0.79 [0.52, 1.20]        | 0.75 [0.35, 1.51]        | 0.75 [0.34, 1.56]        |
| <i>Western Europe * trust.gov.info</i>       | 0.94 [0.68, 1.31]        | 0.80 [0.47, 1.32]        | 0.89 [0.51, 1.51]        |
| <i>Southern Europe * trust.health.info</i>   | 0.92 [0.71, 1.20]        | 0.73 [0.44, 1.17]        | 0.73 [0.44, 1.18]        |
| <i>Western Europe * trust.health.info</i>    | 0.88 [0.71, 1.09]        | 0.80 [0.56, 1.13]        | 0.86 [0.60, 1.23]        |
| <i>Southern Europe * trust.local.info</i>    | 0.91 [0.55, 1.48]        | 0.82 [0.30, 1.97]        | 0.88 [0.30, 2.24]        |
| <i>Western Europe * trust.local.info</i>     | 1.17 [0.80, 1.72]        | 1.91 [1.06, 3.45]*       | 2.34 [1.25, 4.41]**      |
| <i>Southern Europe * trust.doctors.info</i>  | 1.19 [0.94, 1.51]        | 0.98 [0.70, 1.38]        | 1.07 [0.74, 1.55]        |
| <i>Western Europe * trust.doctors.info</i>   | 0.97 [0.80, 1.18]        | 0.96 [0.74, 1.24]        | 1.02 [0.77, 1.34]        |
| <i>Southern Europe * trust.media.info</i>    | 1.05 [0.65, 1.66]        | 0.62 [0.25, 1.37]        | 0.56 [0.21, 1.34]        |
| <i>Western Europe * trust.media.info</i>     | 1.04 [0.73, 1.47]        | 0.70 [0.40, 1.18]        | 0.79 [0.44, 1.39]        |
| <i>Southern Europe * trust.web.info</i>      | 1.66 [1.11, 2.47]*       | 1.05 [0.60, 1.79]        | 1.15 [0.63, 2.07]        |
| <i>Western Europe * trust.web.info</i>       | 1.27 [0.90, 1.79]        | 0.88 [0.57, 1.36]        | 1.05 [0.65, 1.68]        |
| <i>Southern Europe * trust.networks.info</i> | 0.87 [0.53, 1.42]        | 0.96 [0.49, 1.82]        | 1.03 [0.49, 2.10]        |
| <i>Western Europe * trust.networks.info</i>  | 0.70 [0.46, 1.04]        | 0.78 [0.47, 1.28]        | 0.76 [0.43, 1.32]        |
| <i>Southern Europe * trust.people.info</i>   | 1.04 [0.69, 1.54]        | 0.99 [0.52, 1.79]        | 0.98 [0.49, 1.87]        |
| <i>Western Europe * trust.people.info</i>    | 1.23 [0.97, 1.57]        | 1.17 [0.83, 1.63]        | 1.30 [0.90, 1.87]        |
| <i>Southern Europe * Age</i>                 | 1.00 [0.99, 1.01]        | 0.99 [0.98, 1.01]        | 1.00 [0.98, 1.01]        |

| Characteristic                              | Model A7                 | Model A8                 | Model A9                 |
|---------------------------------------------|--------------------------|--------------------------|--------------------------|
|                                             | Vaccine hesitancy        | Vaccine refusal          | Hesitancy 2              |
|                                             | OR (95% CI) <sup>†</sup> | OR (95% CI) <sup>†</sup> | OR (95% CI) <sup>†</sup> |
| <i>Western Europe * Age</i>                 | 0.99 [0.99, 1.00]*       | 1.00 [0.99, 1.01]        | 1.00 [0.99, 1.01]        |
| <i>Southern Europe * Education</i>          | 1.02 [0.99, 1.05]        | 1.03 [0.99, 1.07]        | 1.05 [1.00, 1.09]*       |
| <i>Western Europe * Education</i>           | 1.02 [1.00, 1.04]        | 1.02 [0.99, 1.05]        | 1.02 [0.99, 1.06]        |
| <i>Southern Europe * Male</i>               | 1.0 [0.79, 1.26]         | 1.19 [0.85, 1.67]        | 1.23 [0.85, 1.77]        |
| <i>Western Europe * Male</i>                | 0.99 [0.82, 1.19]        | 1.05 [0.82, 1.34]        | 1.07 [0.81, 1.40]        |
| <i>Southern Europe * City</i>               | 0.93 [0.74, 1.18]        | 1.07 [0.76, 1.50]        | 1.02 [0.70, 1.47]        |
| <i>Western Europe * City</i>                | 0.84 [0.68, 1.03]        | 1.00 [0.76, 1.31]        | 0.91 [0.67, 1.22]        |
| <i>Southern Europe * manual</i>             | 0.56 [0.32, 0.96]*       | 0.28 [0.09, 0.71]*       | 0.23 [0.07, 0.64]**      |
| <i>Western Europe * manual</i>              | 0.80 [0.56, 1.14]        | 0.95 [0.59, 1.50]        | 0.79 [0.46, 1.34]        |
| <i>Southern Europe * no activity</i>        | 1.23 [0.92, 1.63]        | 1.39 [0.91, 2.10]        | 1.47 [0.93, 2.31]        |
| <i>Western Europe * no activity</i>         | 0.92 [0.72, 1.17]        | 0.85 [0.62, 1.17]        | 0.84 [0.59, 1.19]        |
| <i>Southern Europe * self-employed</i>      | 1.01 [0.73, 1.39]        | 1.52 [0.98, 2.36]        | 1.40 [0.87, 2.26]        |
| <i>Western Europe * self-employed</i>       | 1.04 [0.76, 1.40]        | 1.36 [0.92, 1.98]        | 1.17 [0.77, 1.78]        |
| <i>Southern Europe * vaccines.safe</i>      | 0.86 [0.62, 1.18]        | 0.91 [0.59, 1.42]        | 0.97 [0.60, 1.56]        |
| <i>Western Europe * vaccines.safe</i>       | 0.95 [0.75, 1.21]        | 0.90 [0.66, 1.23]        | 1.01 [0.72, 1.42]        |
| <i>Southern Europe * vaccines.effective</i> | 1.44 [0.99, 2.10]        | 0.89 [0.56, 1.41]        | 1.13 [0.67, 1.89]        |
| <i>Western Europe * vaccines.effective</i>  | 1.19 [0.90, 1.57]        | 0.86 [0.62, 1.20]        | 1.17 [0.81, 1.69]        |
| <i>Southern Europe * knows.ill.covid</i>    | 1.23 [0.93, 1.63]        | 0.86 [0.59, 1.26]        | 1.00 [0.66, 1.52]        |
| <i>Western Europe * knows.ill.covid</i>     | 1.08 [0.87, 1.34]        | 0.96 [0.74, 1.27]        | 1.07 [0.79, 1.45]        |
| <i>Southern Europe * was.ill.covid</i>      | 0.85 [0.57, 1.25]        | 0.96 [0.52, 1.70]        | 0.83 [0.43, 1.55]        |
| <i>Western Europe * was.ill.covid</i>       | 0.82 [0.60, 1.11]        | 1.30 [0.86, 1.94]        | 1.06 [0.68, 1.64]        |
| <i>Southern Europe * fears.covid</i>        | 0.96 [0.76, 1.22]        | 1.05 [0.71, 1.54]        | 1.07 [0.70, 1.61]        |
| <i>Western Europe * fears.covid</i>         | 1.14 [0.93, 1.40]        | 1.17 [0.83, 1.63]        | 1.39 [0.97, 1.96]        |
| <i>Number of observations</i>               | <i>19,944</i>            | <i>19,944</i>            | <i>17,212</i>            |

|                                    | <b>Model A7<br/>Vaccine hesitancy</b> | <b>Model A8<br/>Vaccine refusal</b> | <b>Model A9<br/>Hesitancy 2</b> |
|------------------------------------|---------------------------------------|-------------------------------------|---------------------------------|
| <b>Characteristic</b>              | <b>OR (95% CI)<sup>†</sup></b>        | <b>OR (95% CI)<sup>†</sup></b>      | <b>OR (95% CI)<sup>†</sup></b>  |
| <i>McFadden's Pseudo R-squared</i> | <i>0.31</i>                           | <i>0.31</i>                         | <i>0.41</i>                     |

<sup>†</sup> \*p<0.05; \*\*p<0.01; \*\*\*p<0.001

### *Mediation analysis*

The analyses above are useful for discovering significant associations between demographic, information-based and other variables with vaccine hesitancy and exploring the reasons for (non)vaccination, but they are not sufficient to identify causal effects of these variables as such, partly for the reason that the models do not consider the causal ordering of the variables included. While the observational and cross-sectional nature of the data preclude making valid causal inference without very strong assumptions, we can estimate a structural model of vaccine hesitancy that can provide estimates of direct, indirect and total effects of different variables. In particular, we propose a 2-step sequential mediation model, in which demographic variables (age and education) affect the likelihood to trust the Internet as a source of information on COVID-19 vaccines, which in its turn affects beliefs in the safety of the vaccines, which in their turn affect vaccine hesitancy. In addition, age and education affect directly beliefs about vaccine safety and vaccine hesitancy, and trust in the Internet affects directly vaccine hesitancy as well.

We estimate the mediation model sketched above using the *lavaan* package for R. The results are summarized in Figure A3, which shows the path coefficients for the direct effects and the estimates of the indirect effects and the total effects in the box. According to the model, the total effect of age on vaccine hesitancy is negative, and most of the effect is exercised directly. The indirect effects of age via vaccine beliefs and via trust in the Internet are significant, but much smaller in size and importance. The total effect of education is also estimated to be negative and is mostly exercised directly. In fact, there does not seem to be a significant effect of education on trust in the Internet as a source of information on COVID-19 vaccines, which precludes the two-step mediation effect. The direct effect of education on belief in the safety of vaccines is large, positive and significant. The effect of trust in the Internet on vaccine hesitancy is positive, large and significant both directly and indirectly via the belief that vaccines are safe.

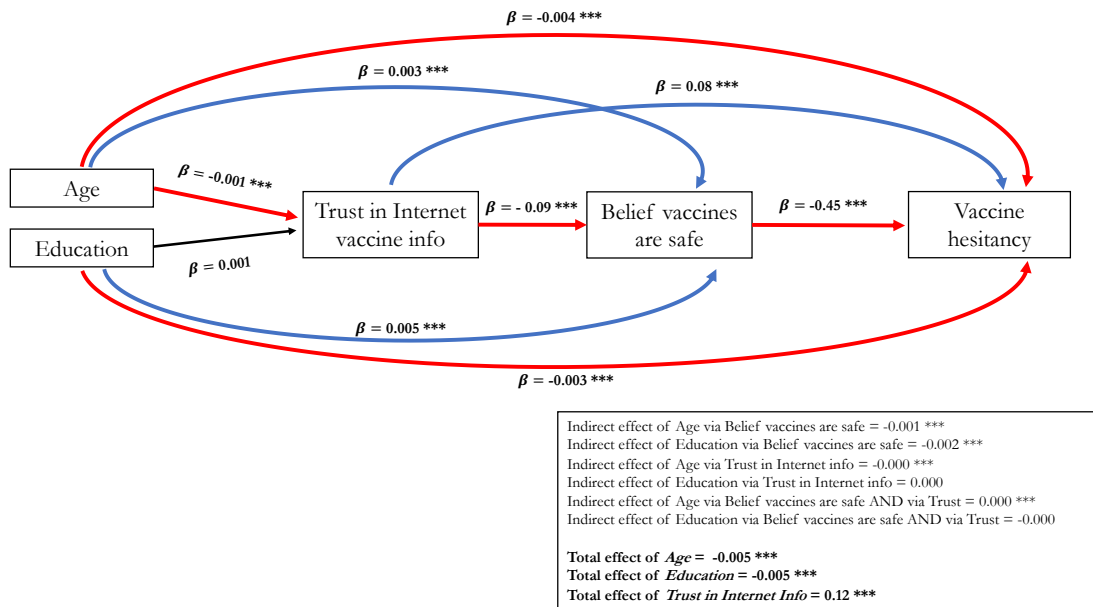

Figure A3. Results from mediation analysis of vaccine hesitancy (two-step sequential mediation model) estimated with the *lavaan* package for R. Logit links are specified for the three equations, since the outcome variables are all binary. Significant positive links are in blue and negative ones are in red; non-significant links are in black. Standardized coefficients are reported (standard errors are not printed); stars indicate levels of statistical significance: \*\*\* < 0.001; \*\* < 0.01, \* < 0.05

Below we present this mediation model estimated in each region in Europe to explore how the patterns differ. There are no major differences between Eastern and Western Europe, but the model for Southern Europe has all direct and indirect effects of education as insignificant. The total effect of trust in the Internet is smallest in Western Europe and greatest in Eastern Europe.

**Eastern Europe**

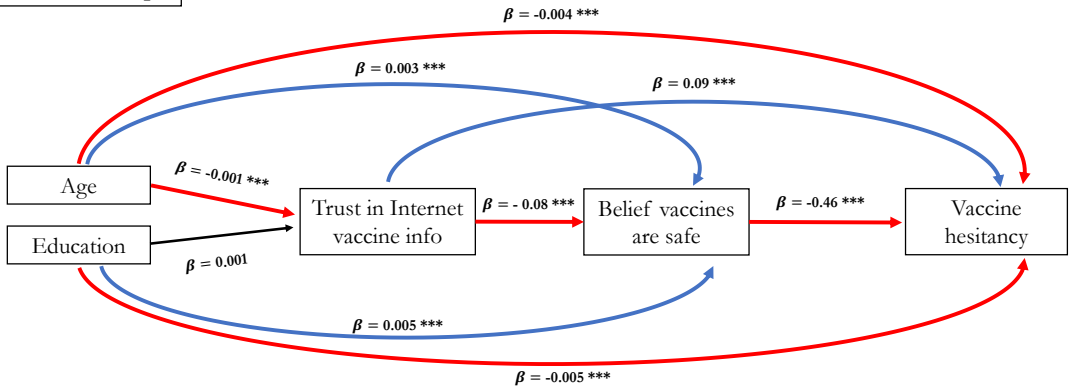

Indirect effect of Age via Belief vaccines are safe = -0.001 \*\*\*  
 Indirect effect of Education via Belief vaccines are safe = -0.002 \*\*\*  
 Indirect effect of Age via Trust in Internet info = -0.000 \*\*\*  
 Indirect effect of Education via Trust in Internet info = 0.000  
 Indirect effect of Age via Belief vaccines are safe AND via Trust = 0.000 \*\*\*  
 Indirect effect of Education via Belief vaccines are safe AND via Trust = -0.000  
 Total effect of Age = -0.006 \*\*\*  
 Total effect of Education = -0.007 \*\*\*  
 Total effect of Trust in Internet Info = 0.13 \*\*\*

**Western Europe**

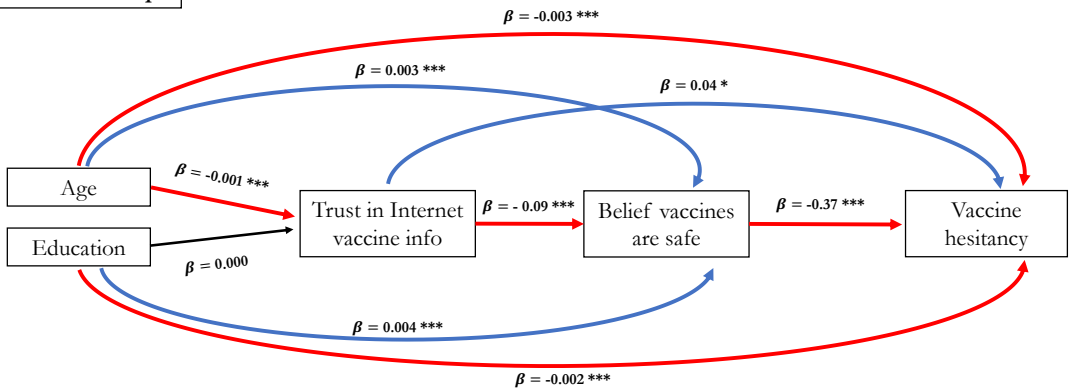

Indirect effect of Age via Belief vaccines are safe = -0.001 \*\*\*  
 Indirect effect of Education via Belief vaccines are safe = -0.002 \*\*\*  
 Indirect effect of Age via Trust in Internet info = -0.000 \*\*\*  
 Indirect effect of Education via Trust in Internet info = 0.000  
 Indirect effect of Age via Belief vaccines are safe AND via Trust = 0.000  
 Indirect effect of Education via Belief vaccines are safe AND via Trust = -0.000  
 Total effect of Age = -0.004 \*\*\*  
 Total effect of Education = -0.003 \*\*\*  
 Total effect of Trust in Internet Info = 0.07 \*\*\*

Southern Europe

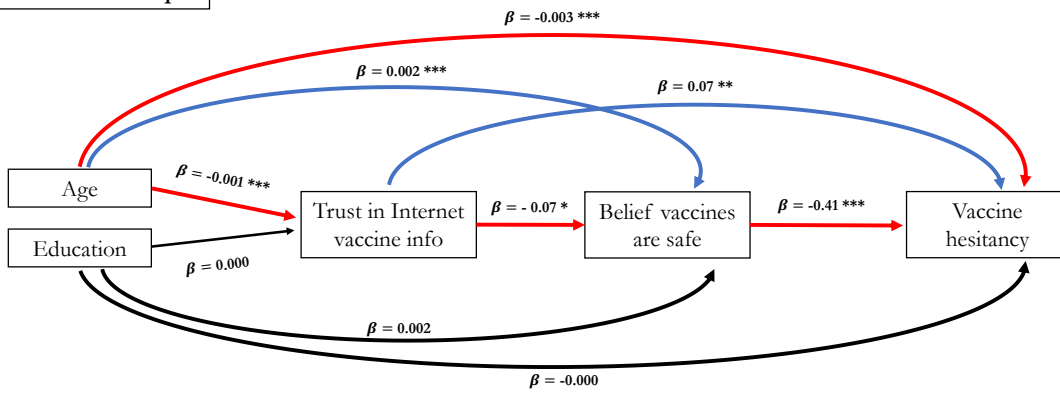

Indirect effect of Age via Belief vaccines are safe = -0.001 \*\*\*  
 Indirect effect of Education via Belief vaccines are safe = -0.001  
 Indirect effect of Age via Trust in Internet info = -0.000  
 Indirect effect of Education via Trust in Internet info = 0.000  
 Indirect effect of Age via Belief vaccines are safe AND via Trust = 0.000  
 Indirect effect of Education via Belief vaccines are safe AND via Trust = -0.000

**Total effect of Age = -0.003 \*\*\***  
**Total effect of Education = -0.001**  
**Total effect of Trust in Internet Info = 0.10 \*\*\***
